# Supplementary material for: Discovery of novel determinants of endothelial lineage using chimeric heterokaryons
Source: eLife. 2017 Mar 21;6:e23588. doi: 10.7554/eLife.23588 (PMC5391207; doi:10.7554/eLife.23588)
Supplement: Figure 4—figure supplement 2—source data 1. — DOI: http://dx.doi.org/10.7554/eLife.23588.010 [file elife-23588-fig4-figsupp2-data1.xlsx]

## Sheet: Sheet1
	2^(B-actin - gene of interest)
	Fli1	SEM
48 hpf	0.0316667	0.00385861
96 hpf	0.037	0.00385861
	C-Myb
48 hpf	0.010044	0.0015794
96 hpf	0.014	0.0025794
