# Supplementary material for: Discovery of novel determinants of endothelial lineage using chimeric heterokaryons
Source: eLife. 2017 Mar 21;6:e23588. doi: 10.7554/eLife.23588 (PMC5391207; doi:10.7554/eLife.23588)
Supplement: Figure 4—source data 1. — DOI: http://dx.doi.org/10.7554/eLife.23588.007 [file elife-23588-fig4-data1.xls]

## Sheet: ISVs
Image 4c
Intersegmental vessels (ISVs) analysis, corresponding to the number of ISVs in 20 somites.
control	pou3f2 KD
18	8
19	10
17	11
18	11
19	13
20	8
18	9
19	10
17	12
18	11
19	10
20	8
18	7
19	14
17	15
18	13
19	15
20	12
18	11
19	11

## Sheet: GFP+ cells
Image 4f-g
FACS analysis of GFP+ cell from Tg(fli1:gfp) zebrafish embryos
control (%)	POU3f2 KD (%)
7.2	3.6
6.5	3.9
6.3	3.3
