# Supplementary figures and images for: Discovery of novel determinants of endothelial lineage using chimeric heterokaryons
Source: eLife journal article supplement (doi:10.7554/elife.23588), 2017-03-21

Figure 4 – supplemental figure 3

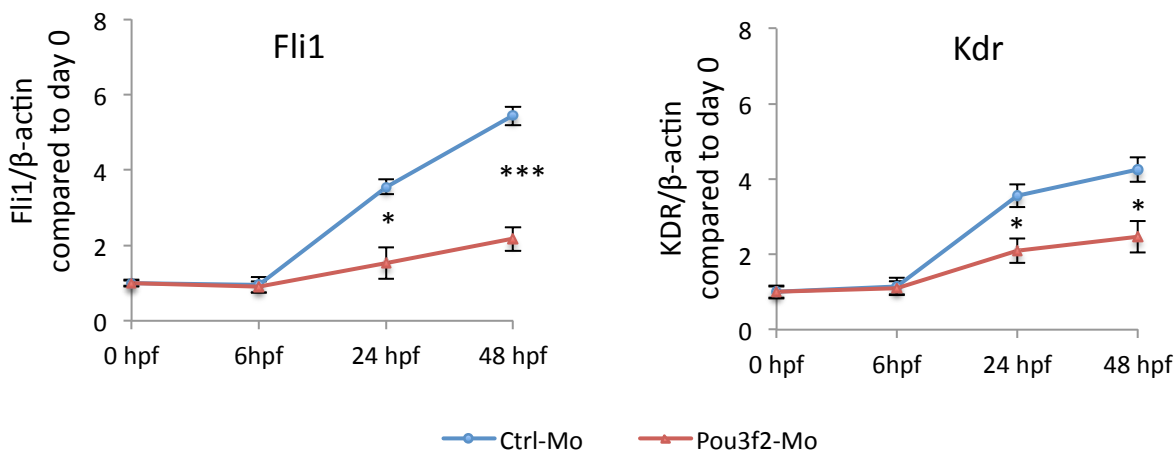

Supplement: supp [file elife-23588-supp-v1.zip]

Figure 4 – supplemental figure 1

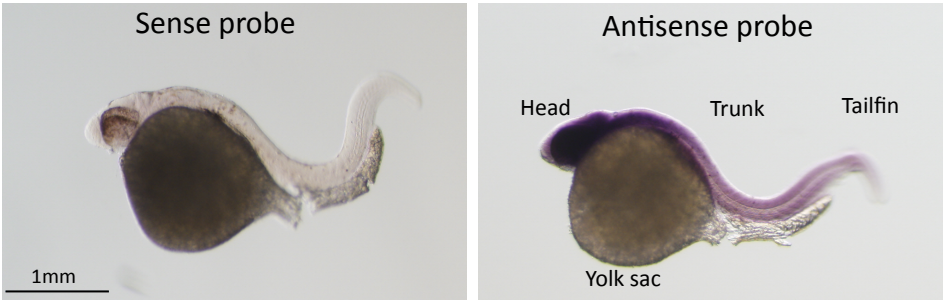

Supplement: supp [file elife-23588-supp-v1.zip]

Figure 4 – supplemental figure 2

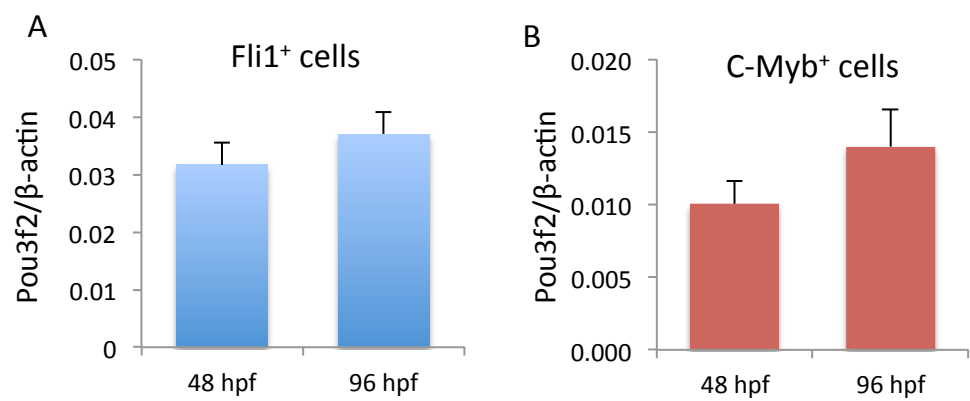

Supplement: supp [file elife-23588-supp-v1.zip]
